# Supplementary material
Source: MDPI journal article supplement (https://www.mdpi.com/2075-163X/14/4/425)
Supplement: s1 [file s1]

Archive with 3 entries (3 files):
- Supplementary_Figure_S1.pdf
- Supplementary_Figure_S2.pdf
- Supplementary_Table_S1.pdf
