# Supplementary material
Source: MDPI journal article supplement (https://www.mdpi.com/2075-163X/14/4/425)
Supplement: s1 [file s1 › Supplementary_Table_S1.pdf]

| Source/incubation | GTDB classification                                                                                                                                | Closest placement reference | Closest placement taxonomy                                                                                                                         | Closest placement (ANI) | Classification Method                                | Completeness (%) | Contamination (%) |
|-------------------|----------------------------------------------------------------------------------------------------------------------------------------------------|-----------------------------|----------------------------------------------------------------------------------------------------------------------------------------------------|-------------------------|------------------------------------------------------|------------------|-------------------|
| <b>sub muros</b>  | d__Bacteria; p__Bacteroidota; c__Bacteroidia; o__Chitinophagales; f__Chitinophagaceae; g__Puia; s__                                                | -                           | -                                                                                                                                                  | -                       | taxonomic classification fully defined by topology   | 98.28            | 0.74              |
| <b>sub muros</b>  | d__Bacteria; p__Proteobacteria; c__Gammaproteobacteria; o__Burkholderiales; f__Burkholderiaceae; g__Undibacterium; s__                             | -                           | -                                                                                                                                                  | -                       | taxonomic classification defined by topology and ANI | 99.45            | 1.1               |
| <b>sub muros</b>  | d__Bacteria; p__Proteobacteria; c__Gammaproteobacteria; o__Xanthomonadales; f__Rhodanobacteraceae; g__Rhodanobacter; s__                           | -                           | -                                                                                                                                                  | -                       | taxonomic classification defined by topology and ANI | 99.66            | 1.03              |
| <b>sub muros</b>  | d__Bacteria; p__Proteobacteria; c__Gammaproteobacteria; o__Burkholderiales; f__Burkholderiaceae; g__Paraburkholderia; s__Paraburkholderia fungorum | GCF_902833645.1             | d__Bacteria; p__Proteobacteria; c__Gammaproteobacteria; o__Burkholderiales; f__Burkholderiaceae; g__Paraburkholderia; s__Paraburkholderia fungorum | 95.25                   | taxonomic classification defined by topology and ANI | 86.83            | 4.31              |
| <b>sub muros</b>  | d__Bacteria; p__Proteobacteria; c__Alphaproteobacteria; o__Rhizobiales; f__Rhizobiaceae; g__Mesorhizobium; s__                                     | -                           | -                                                                                                                                                  | -                       | taxonomic classification defined by topology and ANI | 98.88            | 5.21              |
| <b>sub muros</b>  | d__Bacteria; p__Proteobacteria; c__Gammaproteobacteria; o__DSM-16500; f__DSM-16500; g__UBA5158; s__                                                | -                           | -                                                                                                                                                  | -                       | taxonomic classification fully defined by topology   | 91.28            | 1.94              |
| <b>sub muros</b>  | d__Bacteria; p__Acidobacteriota; c__Acidobacteriae; o__Acidobacteriales; f__Acidobacteriaceae; g__Edaphobacter; s__                                | -                           | -                                                                                                                                                  | -                       | ANI                                                  | 96.59            | 1.72              |
| <b>sub muros</b>  | d__Bacteria; p__Proteobacteria; c__Gammaproteobacteria; o__Burkholderiales; f__Burkholderiaceae; g__Variovorax; s__Variovorax sp001899795          | GCA_001899795.1             | d__Bacteria; p__Proteobacteria; c__Gammaproteobacteria; o__Burkholderiales; f__Burkholderiaceae; g__Variovorax; s__Variovorax sp001899795          | 98.29                   | taxonomic classification defined by topology and ANI | 97.28            | 0.68              |
| <b>sub muros</b>  | d__Bacteria; p__Acidobacteriota; c__Acidobacteriae; o__Acidobacteriales; f__Acidobacteriaceae; g__Edaphobacter; s__                                | GCF_000381605.1             | d__Bacteria; p__Acidobacteriota; c__Acidobacteriae; o__Acidobacteriales; f__Acidobacteriaceae; g__Edaphobacter; s__Edaphobacter sp000381605        | 81.12                   | taxonomic classification defined by topology and ANI | 81.48            | 4.55              |
| <b>sub muros</b>  | d__Bacteria; p__Chlamydiota; c__Chlamydiia; o__Chlamydiales; f__Parachlamydiaceae; g__JABDDC01; s__                                                | -                           | -                                                                                                                                                  | -                       | taxonomic novelty determined using RED               | 97.97            | 1.35              |
| <b>sub muros</b>  | d__Bacteria; p__Bacteroidota; c__Bacteroidia; o__Sphingobacteriales; f__Sphingobacteriaceae; g__Mucilaginibacter; s__                              | GCA_013286565.1             | d__Bacteria; p__Bacteroidota; c__Bacteroidia; o__Sphingobacteriales; f__Sphingobacteriaceae; g__Mucilaginibacter; s__Mucilaginibacter sp013286565  | 79.04                   | taxonomic classification defined by topology and ANI | 97.62            | 0.71              |
| <b>sub muros</b>  | d__Bacteria; p__Proteobacteria; c__Alphaproteobacteria; o__Rhizobiales_A; f__Rhizobiaceae_A; g__Phyllobacterium; s__Phyllobacterium sp900539805    | GCA_900539805.1             | d__Bacteria; p__Proteobacteria; c__Alphaproteobacteria; o__Rhizobiales_A; f__Rhizobiaceae_A; g__Phyllobacterium; s__Phyllobacterium sp900539805    | 96.87                   | taxonomic classification defined by topology and ANI | 94.13            | 0.0               |
| <b>sub muros</b>  | d__Bacteria; p__Acidobacteriota; c__Acidobacteriae; o__Acidobacteriales; f__Acidobacteriaceae; g__Granulicella_C; s__                              | GCA_903970285.1             | d__Bacteria; p__Acidobacteriota; c__Acidobacteriae; o__Acidobacteriales; f__Acidobacteriaceae; g__Granulicella_C; s__Granulicella_C sp903970285    | 77.92                   | taxonomic classification defined by topology and ANI | 94.02            | 0.0               |

|                  |                                                                                                                           |                 |                                                                                                                                             |       |                                                      |       |      |
|------------------|---------------------------------------------------------------------------------------------------------------------------|-----------------|---------------------------------------------------------------------------------------------------------------------------------------------|-------|------------------------------------------------------|-------|------|
| <b>sub muros</b> | d__Bacteria; p__Actinobacteriota; c__Actinomycetia; o__Actinomycetales; f__Micrococcaceae; g__MA-N2; s__MA-N2 sp002009585 | GCF_002009585.1 | d__Bacteria; p__Actinobacteriota; c__Actinomycetia; o__Actinomycetales; f__Micrococcaceae; g__MA-N2; s__MA-N2 sp002009585                   | 95.76 | taxonomic classification defined by topology and ANI | 94.78 | 0.29 |
| <b>sub muros</b> | d__Bacteria; p__Proteobacteria; c__Gammaproteobacteria; o__Steroidobacterales; f__Steroidobacteraceae; g__Bog-1198; s__   | GCA_003165495.1 | d__Bacteria; p__Proteobacteria; c__Gammaproteobacteria; o__Steroidobacterales; f__Steroidobacteraceae; g__Bog-1198; s__Bog-1198 sp003165495 | 84.08 | taxonomic classification defined by topology and ANI | 93.98 | 5.78 |
| <b>sub muros</b> | d__Bacteria; p__Proteobacteria; c__Alphaproteobacteria; o__Azospirillales_A; f__BOG-932; g__BOG-932; s__                  | GCA_003165335.1 | d__Bacteria; p__Proteobacteria; c__Alphaproteobacteria; o__Azospirillales_A; f__BOG-932; g__BOG-932; s__BOG-932 sp003165335                 | 80.01 | taxonomic classification defined by topology and ANI | 94.2  | 2.55 |
| <b>sub muros</b> | d__Bacteria; p__Actinobacteriota; c__Acidimicrobiia; o__Acidimicrobiales; f__RAAP-2; g__Bog-756; s__                      | GCA_003153575.1 | d__Bacteria; p__Actinobacteriota; c__Acidimicrobiia; o__Acidimicrobiales; f__RAAP-2; g__Bog-756; s__Bog-756 sp003153575                     | 82.73 | taxonomic classification defined by topology and ANI | 93.94 | 0.43 |
| <b>anoxic</b>    | d__Bacteria; p__Firmicutes_D; c__Proteinivoracia; o__UBA4975; f__UBA4975; g__; s__                                        | -               | -                                                                                                                                           | -     | taxonomic novelty determined using RED               | 81.92 | 0.0  |
| <b>anoxic</b>    | d__Bacteria; p__Proteobacteria; c__Alphaproteobacteria; o__Rhizobiales; f__Hyphomicrobiaceae; g__Hyphomicrobium; s__      | -               | -                                                                                                                                           | -     | ANI                                                  | 91.67 | 1.42 |
| <b>anoxic</b>    | d__Bacteria; p__Proteobacteria; c__Alphaproteobacteria; o__Rhizobiales; f__Beijerinckiaceae; g__Microvirga; s__           | GCF_011777495.1 | d__Bacteria; p__Proteobacteria; c__Alphaproteobacteria; o__Rhizobiales; f__Beijerinckiaceae; g__Microvirga; s__Microvirga sp011777495       | 87.18 | taxonomic classification defined by topology and ANI | 97.54 | 1.52 |
| <b>anoxic</b>    | d__Bacteria; p__Firmicutes_B; c__Thermincolia; o__Thermincolales; f__UBA2595; g__; s__                                    | -               | -                                                                                                                                           | -     | taxonomic novelty determined using RED               | 98.85 | 3.18 |
| <b>anoxic</b>    | d__Bacteria; p__Acidobacteriota; c__Acidobacteriae; o__Bryobacterales; f__Bryobacteraceae; g__Solibacter; s__             | -               | -                                                                                                                                           | -     | taxonomic novelty determined using RED               | 96.3  | 0.88 |
| <b>anoxic</b>    | d__Bacteria; p__Acidobacteriota; c__Acidobacteriae; o__Bryobacterales; f__Bryobacteraceae; g__; s__                       | -               | -                                                                                                                                           | -     | taxonomic novelty determined using RED               | 99.12 | 1.75 |
| <b>anoxic</b>    | d__Bacteria; p__Firmicutes_A; c__Clostridia_A; o__Christensenellales; f__; g__; s__                                       | -               | -                                                                                                                                           | -     | taxonomic novelty determined using RED               | 91.93 | 2.92 |
| <b>anoxic</b>    | d__Bacteria; p__Firmicutes_E; c__DTU015; o__UBA9673; f__UBA9673; g__; s__                                                 | GCA_003599345.1 | d__Bacteria; p__Firmicutes_E; c__DTU015; o__UBA9673; f__UBA9673; g__SURF-36; s__SURF-36 sp003599345                                         | 77.36 | taxonomic classification defined by topology and ANI | 87.62 | 3.8  |
| <b>anoxic</b>    | d__Bacteria; p__Firmicutes_B; c__Thermincolia; o__Carboxydocellales; f__; g__; s__                                        | -               | -                                                                                                                                           | -     | taxonomic novelty determined using RED               | 98.34 | 1.19 |
| <b>anoxic</b>    | d__Bacteria; p__Proteobacteria; c__Alphaproteobacteria; o__Rhizobiales; f__Xanthobacteraceae; g__Tardiphaga; s__          | GCA_004173095.1 | d__Bacteria; p__Proteobacteria; c__Alphaproteobacteria; o__Rhizobiales; f__Xanthobacteraceae; g__Tardiphaga; s__Tardiphaga sp004173095      | 85.46 | taxonomic classification defined by topology and ANI | 95.27 | 0.93 |
| <b>anoxic</b>    | d__Bacteria; p__Proteobacteria; c__Alphaproteobacteria; o__Rhizobiales; f__Rhizobiaceae; g__DUSC01; s__                   | -               | -                                                                                                                                           | -     | taxonomic novelty determined using RED               | 82.9  | 5.51 |
| <b>anoxic</b>    | d__Bacteria; p__Firmicutes_B; c__Desulfitobacteriia; o__Desulfitobacteriales; f__; g__; s__                               | -               | -                                                                                                                                           | -     | taxonomic novelty determined using RED               | 90.26 | 4.59 |
| <b>anoxic</b>    | d__Bacteria; p__Proteobacteria; c__Alphaproteobacteria; o__Rhizobiales; f__Xanthobacteraceae; g__; s__                    | -               | -                                                                                                                                           | -     | taxonomic classification fully defined by topology   | 96.52 | 1.53 |

|               |                                                                                                                                   |                 |                                                                                                                                                            |       |                                                            |       |      |
|---------------|-----------------------------------------------------------------------------------------------------------------------------------|-----------------|------------------------------------------------------------------------------------------------------------------------------------------------------------|-------|------------------------------------------------------------|-------|------|
| <b>anoxic</b> | d__Bacteria; p__Proteobacteria;<br>c__Alphaproteobacteria; o__Sphingomonadales;<br>f__Sphingomonadaceae; g__Sphingomonas; s__     | GCA_903884945.1 | d__Bacteria; p__Proteobacteria;<br>c__Alphaproteobacteria; o__Sphingomonadales;<br>f__Sphingomonadaceae; g__Sphingomonas;<br>s__Sphingomonas sp903884945   | 83.1  | taxonomic classification<br>defined by topology and<br>ANI | 99.66 | 2.29 |
| <b>anoxic</b> | d__Bacteria; p__Firmicutes_B; c__Thermincolia;<br>o__Thermincolales; f__ ; g__ ; s__                                              | -               | -                                                                                                                                                          | -     | taxonomic novelty<br>determined using RED                  | 99.74 | 1.11 |
| <b>anoxic</b> | d__Bacteria; p__Firmicutes; c__Bacilli;<br>o__Paenibacillales; f__Paenibacillaceae;<br>g__Paenibacillus_G; s__                    | GCF_007786445.1 | d__Bacteria; p__Firmicutes; c__Bacilli;<br>o__Paenibacillales; f__Paenibacillaceae;<br>g__Paenibacillus_G; s__Paenibacillus_G<br>sp007786445               | 77.94 | taxonomic classification<br>defined by topology and<br>ANI | 86.14 | 0.45 |
| <b>anoxic</b> | d__Bacteria; p__Proteobacteria;<br>c__Alphaproteobacteria; o__Rhizobiales;<br>f__Xanthobacteraceae; g__PALSA-894; s__             | -               | -                                                                                                                                                          | -     | taxonomic novelty<br>determined using RED                  | 99.6  | 2.82 |
| <b>anoxic</b> | d__Bacteria; p__Actinobacteriota;<br>c__Thermoleophilia; o__Solirubrobacterales;<br>f__Solirubrobacteraceae; g__Conexibacter; s__ | GCF_014199525.1 | d__Bacteria; p__Actinobacteriota;<br>c__Thermoleophilia; o__Solirubrobacterales;<br>f__Solirubrobacteraceae; g__Conexibacter;<br>s__Conexibacter arvalis   | 86.9  | taxonomic classification<br>defined by topology and<br>ANI | 96.15 | 3.42 |
| <b>anoxic</b> | d__Bacteria; p__Proteobacteria;<br>c__Alphaproteobacteria; o__Rhizobiales;<br>f__Xanthobacteraceae; g__VAZQ01; s__                | GCA_009377695.1 | d__Bacteria; p__Proteobacteria;<br>c__Alphaproteobacteria; o__Rhizobiales;<br>f__Xanthobacteraceae; g__VAZQ01; s__VAZQ01<br>sp009377695                    | 83.42 | taxonomic classification<br>defined by topology and<br>ANI | 86.46 | 1.69 |
| <b>anoxic</b> | d__Bacteria; p__Firmicutes_B; c__Thermincolia;<br>o__Thermincolales; f__UBA2595; g__GW-<br>Firmicutes-8; s__                      | GCA_002840165.1 | d__Bacteria; p__Firmicutes_B; c__Thermincolia;<br>o__Thermincolales; f__UBA2595; g__GW-<br>Firmicutes-8; s__GW-Firmicutes-8 sp002840165                    | 92.8  | taxonomic classification<br>defined by topology and<br>ANI | 99.49 | 1.15 |
| <b>oxic</b>   | d__Bacteria; p__Firmicutes_B; c__Thermincolia;<br>o__Carboxydocellales; f__ ; g__ ; s__                                           | -               | -                                                                                                                                                          | -     | taxonomic novelty<br>determined using RED                  | 94.82 | 8.49 |
| <b>oxic</b>   | d__Bacteria; p__Bacteroidota; c__Bacteroidia;<br>o__Sphingobacteriales; f__Sphingobacteriaceae;<br>g__Mucilaginibacter; s__       | GCA_013286565.1 | d__Bacteria; p__Bacteroidota; c__Bacteroidia;<br>o__Sphingobacteriales; f__Sphingobacteriaceae;<br>g__Mucilaginibacter; s__Mucilaginibacter<br>sp013286565 | 78.96 | taxonomic classification<br>defined by topology and<br>ANI | 89.24 | 3.65 |
