# Supplementary material
Source: MDPI journal article supplement (https://www.mdpi.com/2075-163X/14/4/425)

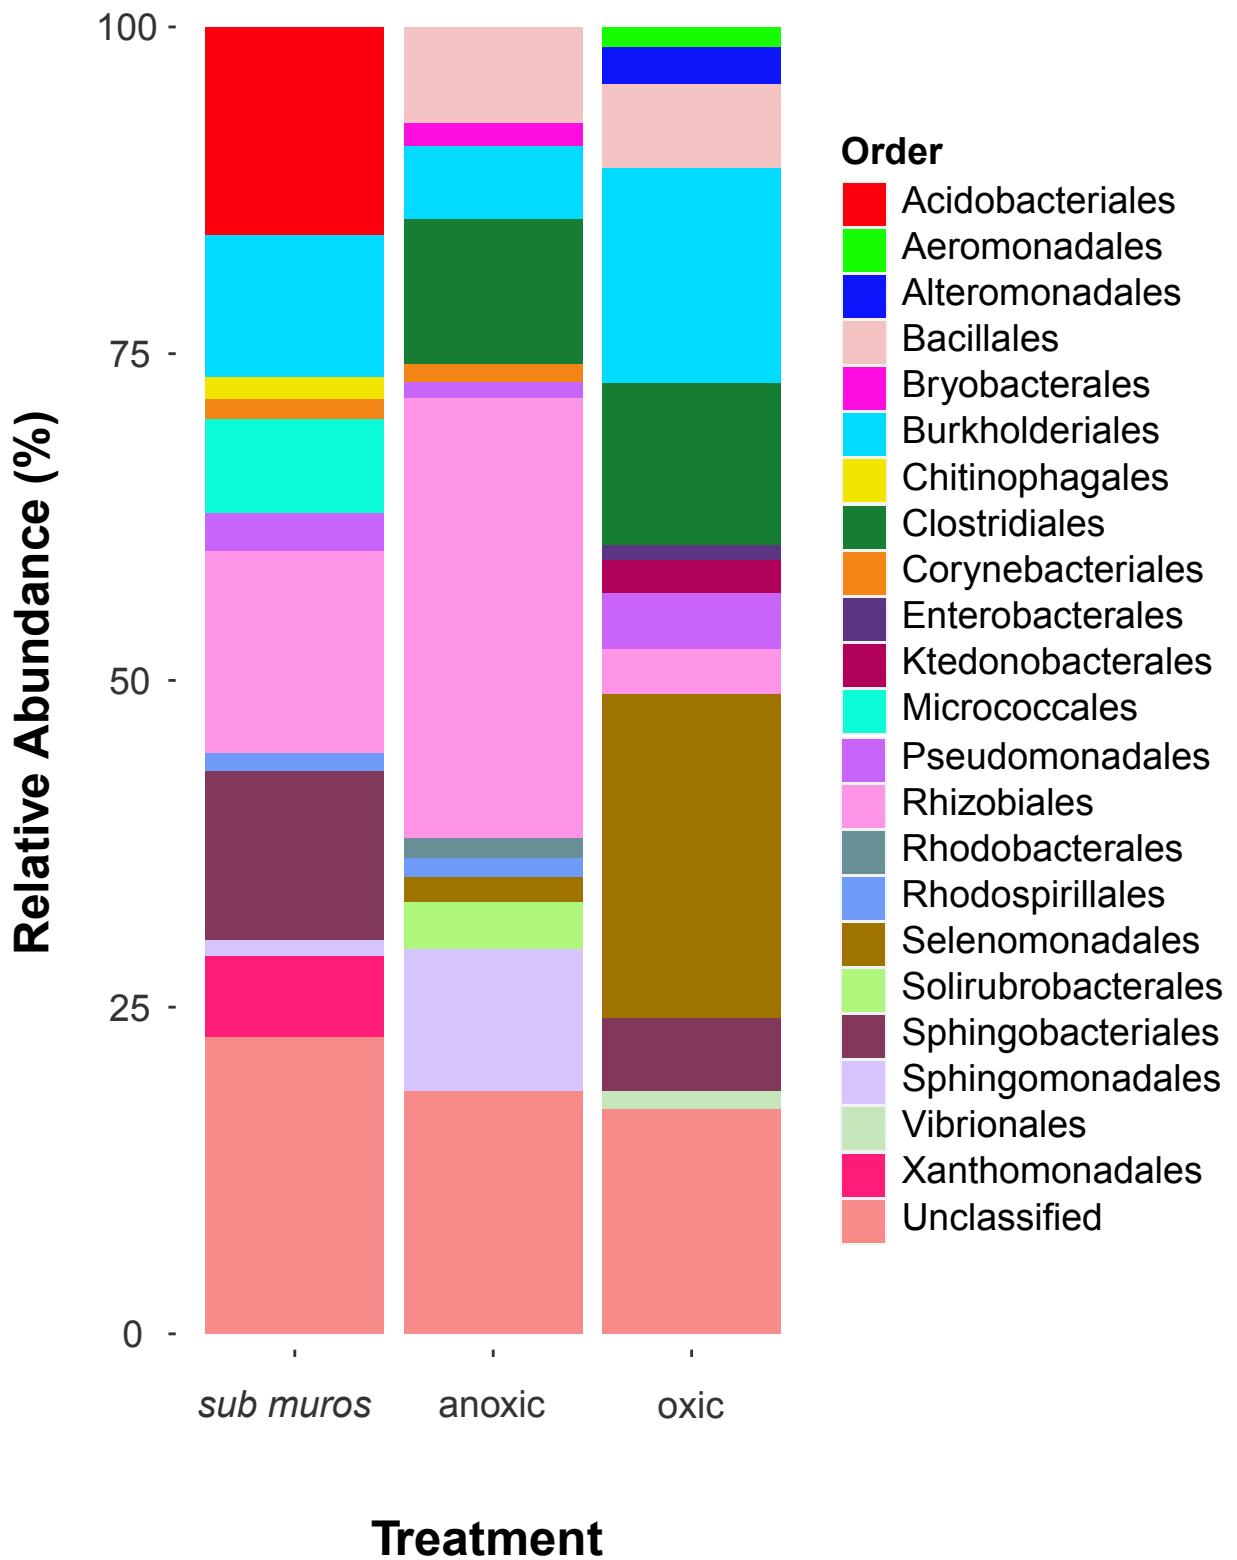

Supplement: s1 [file s1 › Supplementary_Figure_S1.pdf]

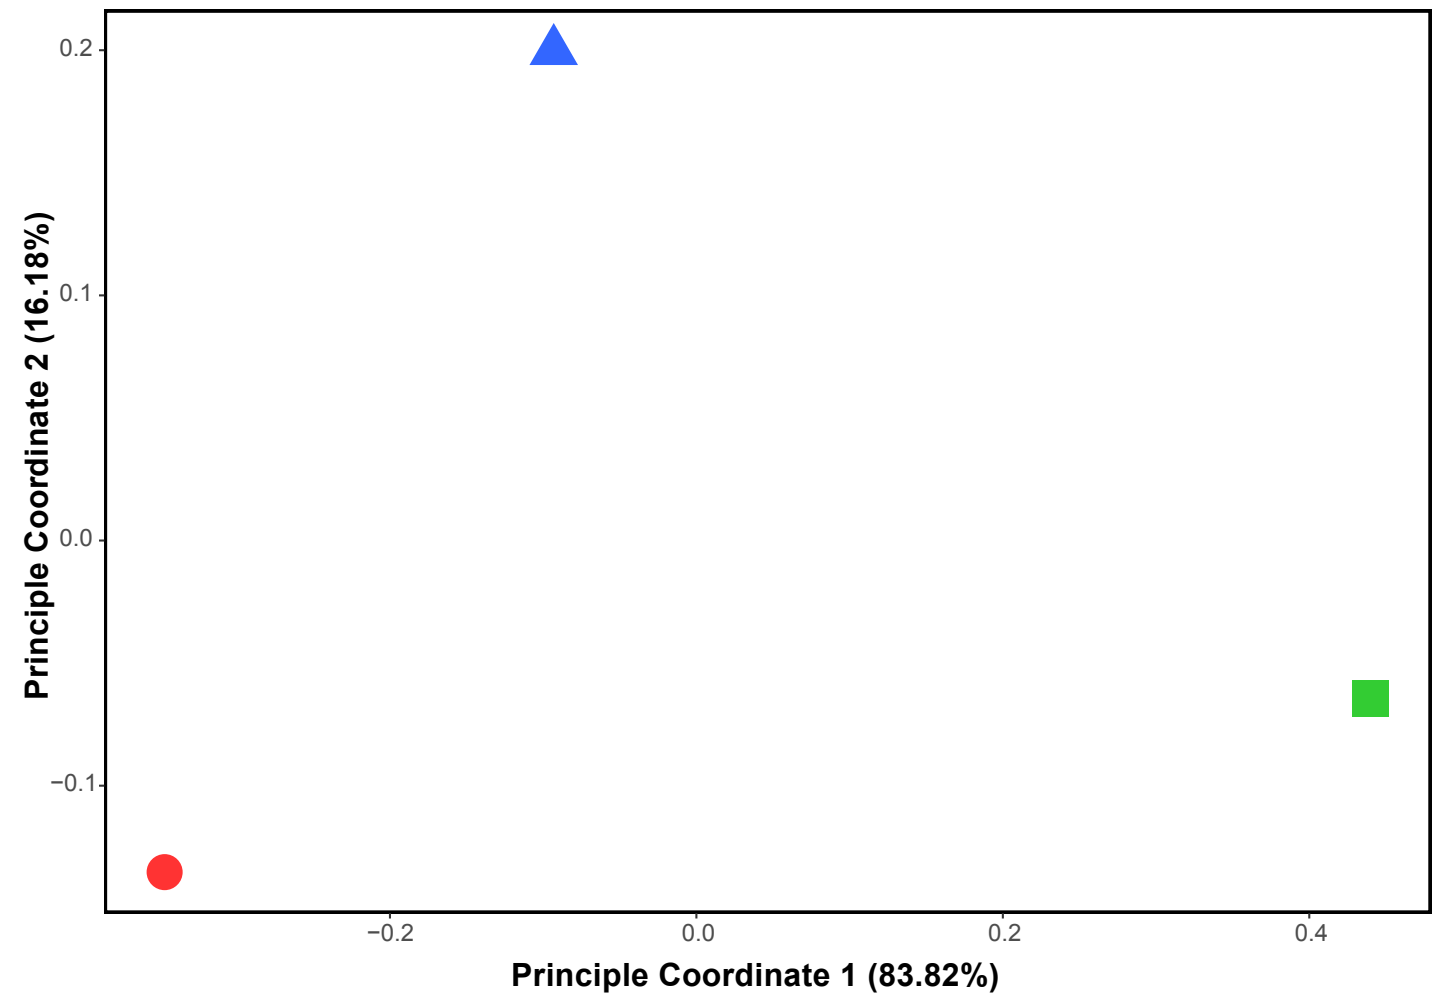

Supplement: s1 [file s1 › Supplementary_Figure_S2.pdf]
